# Supplementary material
Source: Research Square preprint supplement (doi:10.21203/rs.3.rs-9268558/v1)
Supplement: Supplementary file 1 [file 848eaf1d2d206fe3aece33fa.docx]

**Supplementary Figures**

**Figure S1: Frequency of antimicrobial resistance genes detected by ResFinder in 26 E. coli isolates.** Bar plot showing the number of isolates carrying each resistance gene after filtering (≥95% identity, ≥100% coverage).

**Figure S2: Heatmap of plasmid presence/absence across 26 E. coli isolates**. Each row corresponds to an isolate and each column represents a unique plasmid replicon identified by PlasmidFinder. Blue shading indicates plasmid presence (1), and Lightgreen shading indicates absence (0). Both isolates and plasmids were hierarchically clustered, revealing groups of isolates with similar plasmid carriage patterns and clusters of plasmids that frequently co-occur. Distinct clustering of certain isolates (e.g., SM_7, SM_48, SM_26) highlights heterogeneity in plasmid content.

**Figure S3: Principal Component Analysis of Virulence Gene Distribution in E. coli Isolates.** Principal component analysis (PCA) based on the presence–absence matrix of virulence genes. Each point represents an individual virulence gene, and the spatial distribution reflects co-occurrence patterns across isolates. The first two principal components (PC1 and PC2) explain 67.1% and 6.7% of the total variance, respectively. Distinct clustering and separation of genes indicate variability in their distribution and contribution to overall virulence profiles.

**Supplementary Tables**

**Table S1: List of antimicrobials used against resistant isolates along with their disc concentration and diffusion ZOI (Zone of Inhibition, CLSI’2024)**

| **Group of Antimicrobial Agents** | **Antimicrobials** | **Abbreviation** | **Disc Content** | **S** | **I** | **R** |
| --- | --- | --- | --- | --- | --- | --- |
| Penicillin derivatives / β-lactams | Ampicillin | AMP | 10 µg | ≥ 17 | 14–16 | ≤ 13 |
| Cephamycins | Cefoxitin | FOX | 30 µg | ≥ 18 | 15–17 | ≤ 14 |
| 3rd gen cephalosporins (ESBLs) | Cefotaxime | CTX | 30 µg | ≥ 26 | 23–25 | ≤ 22 |
| 3rd gen cephalosporins (ESBLs) | Ceftazidime | CAZ | 30 µg | ≥ 21 | 18–20 | ≤ 17 |
| Tetracyclines | Tetracycline | TE | 30 µg | ≥ 15 | 12–14 | ≤ 11 |
| Tetracyclines | Doxycycline | DOX | 30 µg | ≥ 14 | 11–13 | ≤ 10 |
| Aminoglycosides | Gentamicin | GM | 10 µg | ≥ 18 | 15–17 | ≤ 14 |
| Fluoroquinolones (2nd Gen) | Ciprofloxacin | CIP | 5 µg | ≥ 26 | 22–25 | ≤ 21 |
| Fluoroquinolones (2nd Gen) | Norfloxacin | NOR | 10 µg | ≥ 17 | 13–16 | ≤ 12 |
| Fluoroquinolones (3rd Gen) | Levofloxacin | LEV | 5 µg | ≥ 21 | 17–20 | ≤ 16 |
| Folate pathway inhibitors | Trimethoprim / Sulfamethoxazole | SXT | 1.25/23.75 µg | ≥ 16 | 11–15 | ≤ 10 |

*gen: Generation, *S: Sensitivity, *I: Intermediate, *R: Resistance

**Table S2: Distribution of MDR patterns, number of isolates, Multiple Antibiotic Resistance Index (MARI), and live bird market origins of E. coli isolates.**

| **Live Bird Market** | **MDR Pattern** | **No. of Isolates** | **MARI** |
| --- | --- | --- | --- |
| Pahartali | TE-CIP | 1 | 0.18 |
| AMP-DOX-TE-GM-CIP-NOR-LEV-SXT | 2 | 0.72 |
| Colonel Hat | AMP-TE-CIP-LEV | 1 | 0.36 |
| AMP-FOX-DOX-TE-CIP-NOR-LEV-SXT | 1 | 0.72 |
| AMP-DOX-TE-GM-CIP-NOR-LEV-SXT | 1 | 0.72 |
| AMP-FOX-DOX-TE-GM-CIP-NOR-LEV-SXT | 1 | 0.81 |
| Bahaddarhat | AMP-FOX-DOX-TE-SXT | 1 | 0.45 |
| AMP-FOX-CTX-CAZ-DOX-TE-CIP-NOR-LEV-SXT | 1 | 0.90 |
| AMP-FOX-CTX-CAZ-DOX-TE-GM-CIP-NOR-LEV | 1 | 0.90 |
| AMP-FOX-CTX-CAZ-DOX-TE-CIP-NOR-LEV-SXT | 1 | 0.90 |
| Reazuddin Bazar | AMP-TE-CIP-SXT | 1 | 0.36 |
| AMP-DOX-TE-GM-CIP-NOR-LEV-SXT | 1 | 0.72 |
| AMP-FOX-DOX-TE-CIP-NOR-LEV-SXT | 1 | 0.72 |
| Oxygen | AMP-FOX-CTX-CAZ-DOX-TE-SXT | 1 | 0.56 |
| AMP-FOX-CTX-CAZ-TE-GM-CIP-LEV | 1 | 0.63 |
| AMP-DOX-TE-GM-CIP-NOR-LEV-SXT | 1 | 0.72 |
| Chawkbazar | AMP-FOX-DOX-TE-GM-SXT | 1 | 0.54 |
| AMP-DOX-TE-CIP-NOR-LEV-SXT | 1 | 0.63 |
| AMP-FOX-CTX-CAZ-DOX-TE-CIP-NOR-LEV-SXT | 1 | 0.90 |
| AMP-FOX-CTX-CAZ-DOX-TE-GM-CIP-NOR-LEV | 1 | 0.90 |
| Jhautala | AMP-DOX-TE-GM-CIP-NOR-LEV | 1 | 0.63 |
| AMP-FOX-DOX-TE-GM-CIP-NOR-LEV | 1 | 0.72 |
| AMP-DOX-TE-GM-CIP-NOR-LEV | 1 | 0.63 |
| AMP-FOX-DOX-TE-CIP-NOR-LEV-SXT | 1 | 0.72 |
| Sarai Para | AMP-FOX-DOX-TE-CIP-NOR-LEV-SXT | 1 | 0.72 |
| AMP-FOX-CTX-CAZ-DOX-TE-GM-CIP-NOR-LEV-SXT | 1 | 1.00 |
| AMP-DOX-TE-GM-CIP-NOR-LEV-SXT | 1 | 0.72 |
| Agrabad | AMP-DOX-TE-GM-CIP-NOR-LEV-SXT | 1 | 0.72 |
| AMP-FOX-DOX-TE-GM-CIP-NOR-LEV-SXT | 2 | 0.81 |
| AMP-FOX-CTX-DOX-TE-CIP-NOR-LEV | 1 | 0.72 |
| AMP-CTX-CAZ-DOX-TE-GM-CIP-NOR-LEV-SXT | 1 | 0.90 |
| 2no. Gate | AMP-FOX-CAZ-DOX-TE-CIP-NOR-LEV-SXT | 1 | 0.81 |
| AMP-FOX-DOX-TE-GM-CIP-NOR-LEV-SXT | 1 | 0.81 |
| AMP-FOX-DOX-TE-GM-CIP-NOR-LEV-SXT | 2 | 0.81 |
